# Supplementary material for: Retinoic Acid Improves the Recovery of Replication-Competent Virus from Latent SIV Infected Cells
Source: PubMed Central journal article supplement (PMC7565696; doi:10.3390/cells9092076), 2020-09-11
Supplement: cells-09-02076-s001.pdf [file cells-09-02076-s001.pdf]

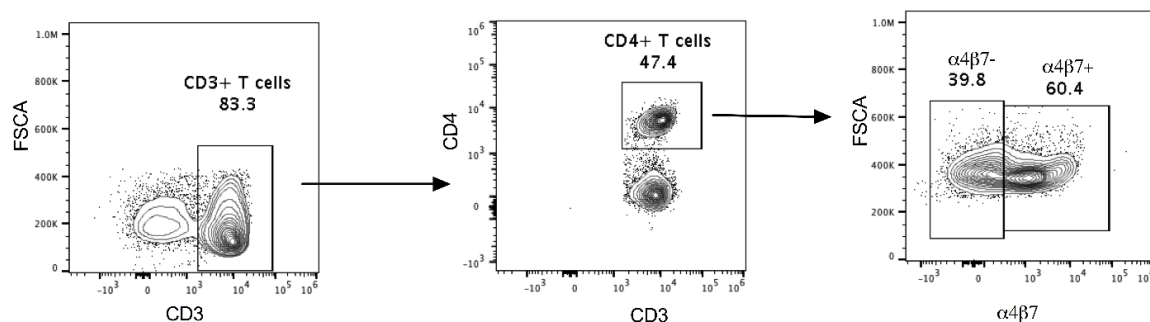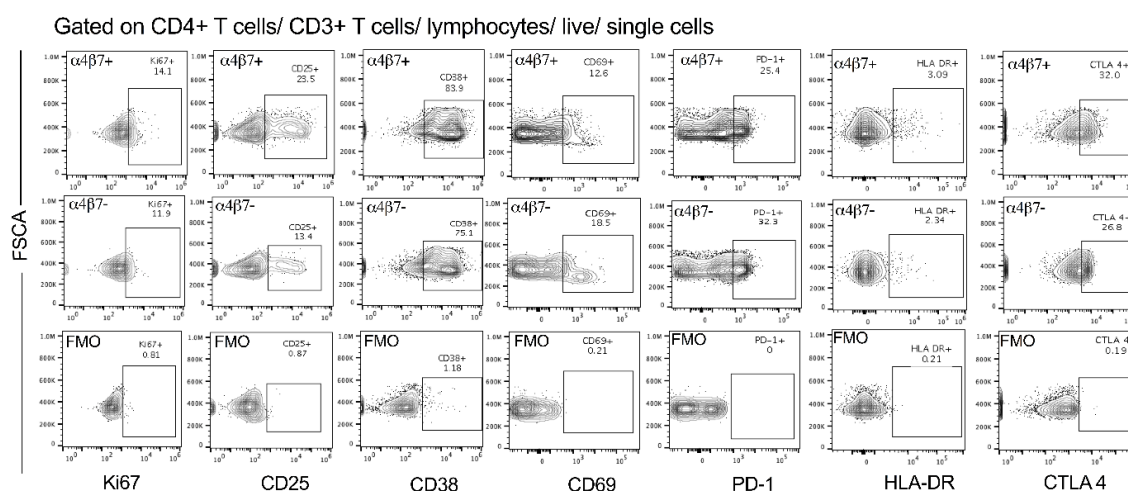

**Supplementary Figure S1:** Gating strategy used to understand changes that occur in the percent expression of several immune activation (IA) markers obtained from  $\alpha 4\beta 7^+$  or  $\alpha 4\beta 7^-$  CD4<sup>+</sup> T cells profiled from PBMCs that were previously treated with CD3/ CD28 + IL2 + RA or CD3/ CD28 + IL2 conditions. Briefly, CD3<sup>+</sup> T cells previously gated from Lymphocytes/ live cells/ singlets/ FSC-A vs Time were sequentially gated to yield CD4<sup>+</sup> T cells and  $\alpha 4\beta 7^+$  and  $\alpha 4\beta 7^-$  populations respectively. Then the  $\alpha 4\beta 7^+$  and  $\alpha 4\beta 7^-$  populations were further probed for levels of percent expression of Ki67, CD25, CD38, CD69, PD-1, HLA DR and CTLA4 immune activation markers.

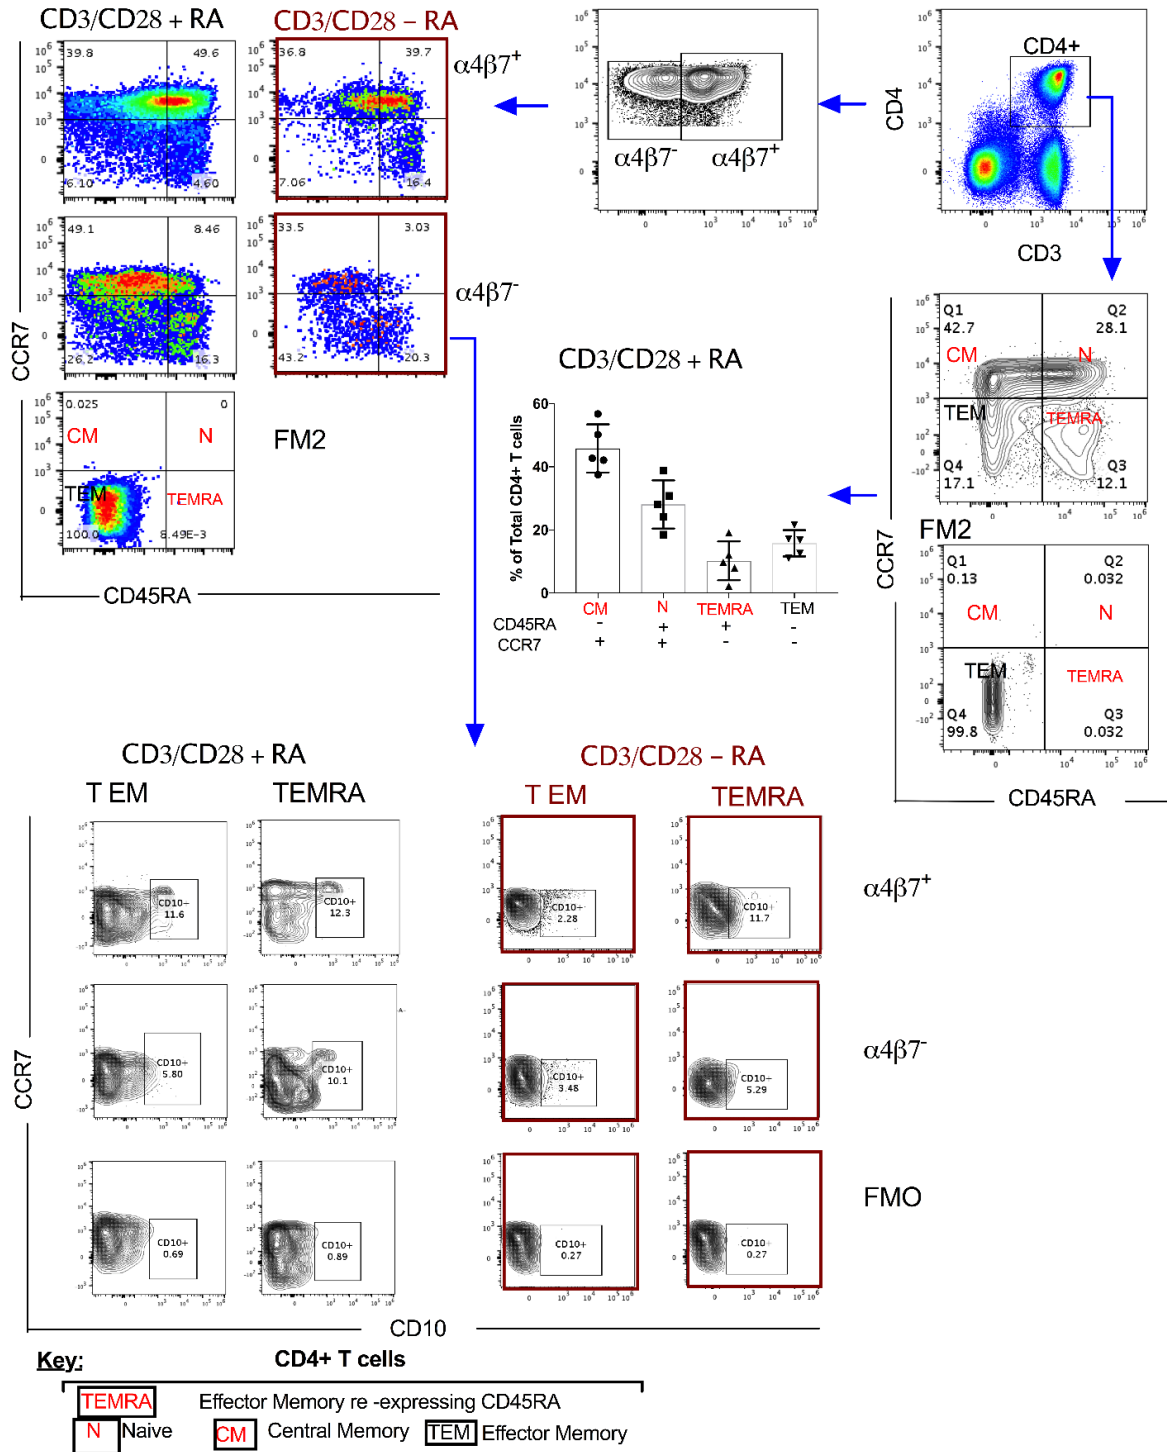

**Supplementary Figure S2:** Gating strategy used to delineate the memory and differentiation patterns in CD4<sup>+</sup> T cells after PBMCs have been treated with CD3/CD28 beads with/ without RA. Exclusive gating was used to obtain CD4<sup>+</sup> T cells from CD3<sup>+</sup> T cells/ live/ singlets. Thereafter, the CD4<sup>+</sup> T cells were separated based on their expression of  $\alpha 4\beta 7$ . At this same step, CD4<sup>+</sup> T cells were profiled for their memory and differentiation status as depicted by levels of naïve (CCR7<sup>+</sup> and CD45RA<sup>+</sup>) cells, central memory (CM) (CCR7<sup>+</sup> and CD45RA<sup>-</sup>) cells, effector memory (EM) (CCR7<sup>-</sup> and CD45RA<sup>-</sup>) and Terminal Effector Memory cells re-expressing CD45RA (TEMRA) (CCR7<sup>-</sup> and CD45RA<sup>+</sup>). Later on, the percentages of naïve cells, CM, EM and TEMRA were evaluated from  $\alpha 4\beta 7^+$  or  $\alpha 4\beta 7^-$  CD4<sup>+</sup> T cells obtained from PBMCs treated with either CD3/ CD28 + retinoic acid (RA) (black) and CD3/ CD28 – retinoic acid (RA) (red). CD45RA and CCR7 FM2 controls were used to create placement gates during

gating. Subsequently, the extent of CD10 expression was also evaluated in naïve, central and effector memory subsets under the previously mentioned conditions.

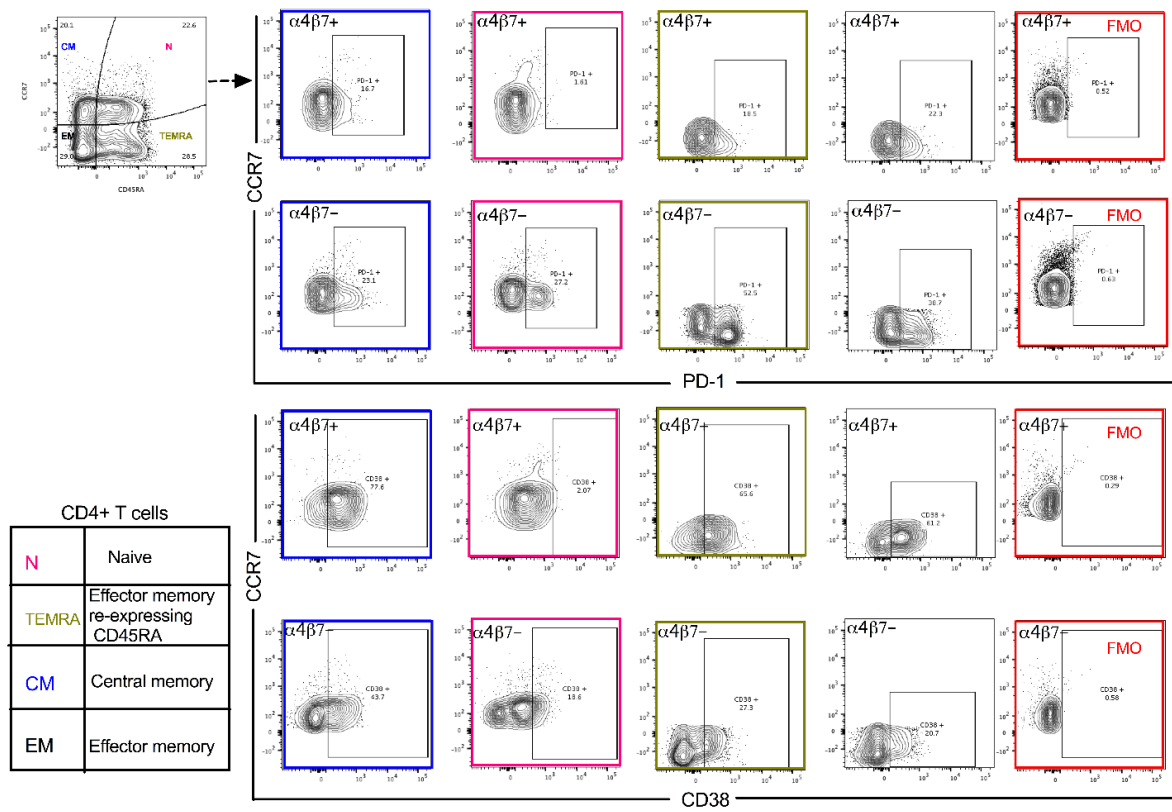

**Supplementary Figure S3:** Gating strategy for immune activation profiles (CD38 and PD-1) within different memory and differentiation  $\alpha 4\beta 7^+$  or  $\alpha 4\beta 7^-$  CD4<sup>+</sup> T cell subsets: Schema showing steps utilized to investigate the expression of PD-1 and CD38 immune activation markers in different  $\alpha 4\beta 7^+$  or  $\alpha 4\beta 7^-$  CD4<sup>+</sup> T cell subsets (naïve (CCR7<sup>+</sup> and CD45RA<sup>+</sup>) cells (pink), central memory (CCR7<sup>+</sup> and CD45RA<sup>-</sup>) cells (blue), effector memory (EM) (CCR7<sup>-</sup> and CD45RA<sup>-</sup>) cells (black), Terminal Effector Memory cells re-expressing CD45RA (TEMRA) (CCR7<sup>-</sup> and CD45RA<sup>+</sup>) (green) and Fluorescent minus one (FMO) controls (red) treated with either CD3/ CD28 + RA .

**Supplementary Table S1:** Detailed description of SIV positive rhesus macaques that were used during this study. Information summarizing the names of the animals, sex, Plasma viral loads, virus that was used for infection, sample type, cART regimen, days on cART and experiments performed were included. Some animals were treated with ant-a4b7 antibody along with cART, in which PBMCs were used for TILDA.

| Macaque | Sex    | Plasma viral loads<br>(Copies/ ml) | Virus     | Sample type            | cART Regimen | Days on<br>cART | Expts<br>used |
|---------|--------|------------------------------------|-----------|------------------------|--------------|-----------------|---------------|
| A8T007  | Female | <50                                | SIVmac251 | PBMCs                  | TFV+FTC+DTG  | 105             | TILDA         |
| RNi15R  | Female | <50                                | SIVmac251 | PBMCs                  | TFV+FTC+DTG  | 105             | TILDA         |
| RTh15R  | Female | <50                                | SIVmac251 | PBMCs                  | TFV+FTC+DTG  | 105             | TILDA         |
| RVi15R  | Female | <50                                | SIVmac251 | PBMCs                  | TFV+FTC+DTG  | 105             | TILDA         |
| A12T015 | Female | <50                                | SIVmac251 | PBMCs                  | TFV+FTC+DTG  | 105             | TILDA         |
| LE67    | Male   | <50                                | SIVmac251 | Axillary<br>lymph node | PmPA+FTC+DTG | 270             | TILDA         |
| LD08    | Male   | <50                                | SIVmac251 | Axillary<br>lymph node | PmPA+FTC+DTG | 270             | TILDA         |
| LA89    | Male   | <50                                | SIVmac251 | Axillary<br>lymph node | PmPA+FTC+DTG | 270             | TILDA         |
| KV50    | Male   | <50                                | SIVmac251 | Axillary<br>lymph node | PmPA+FTC+DTG | 270             | TILDA         |
| ROg15R  | Female | <50                                | SIVmac251 | PBMCs                  | TFV+FTC+DTG  | 105             | QVOA          |
| A12T015 | Female | <50                                | SIVmac251 | PBMCs                  | TFV+FTC+DTG  | 105             | QVOA          |
| 13L094  | Female | <50                                | SIVmac251 | PBMCs                  | TFV+FTC+DTG  | 105             | QVOA          |
| A8T007  | Female | <50                                | SIVmac251 | PBMCs                  | TFV+FTC+DTG  | 105             | QVOA          |
| CK03    | Male   | <50                                | SIVmac251 | PBMCs                  | TFV+FTC+DTG  | ~280            | QVOA          |
| CK40    | Male   | <50                                | SIVmac251 | PBMCs                  | TFV+FTC+DTG  | ~280            | QVOA          |
| CI04    | Male   | <50                                | SIVmac251 | PBMCs                  | TFV+FTC+DTG  | ~280            | QVOA          |
| CI47    | Male   | <50                                | SIVmac251 | PBMCs                  | TFV+FTC+DTG  | ~280            | QVOA          |
| ROg13   | N/A    | 390148*                            | SIVmac239 | PBMCs/<br>plasma       | N/A          | N/A             | In-vivo<br>RA |
| RPp13   | N/A    | 3019*                              | SIVmac239 | PBMCs/<br>plasma       | N/A          | N/A             | In-vivo<br>RA |
| RYd13   | N/A    | 24034*                             | SIVmac239 | PBMCs/<br>plasma       | N/A          | N/A             | In-vivo<br>RA |
| RZc14   | N/A    | 4548*                              | SIVmac239 | PBMCs/<br>plasma       | N/A          | N/A             | In-vivo<br>RA |

PBMCs: Peripheral Blood Mononuclear Cells; cART: combination Antiretroviral Therapy; TFV+FTC+DTG: Tenofovir+ Emtricitabine+ Dolutegravir; PmPA+FTC+DTG: Tenofovir+ Emtricitabine+ Dolutegravir; N/A: Not Applicable; Expts: Experiments; TILDA: Tat/Rev Induced Limited Dilution Assay; QVOA: Quantitative Viral Outgrowth Assay; RA: Retinoic Acid, Plasma viral loads (Copies/ ml) \* - viral loads at time point when RA was administered.
